# Supplementary material for: A novel bioemulsifier from Geobacillus stearothermophilus A-2 and its potential application in microbial enhanced oil recovery
Source: Royal Society of Chemistry journal article supplement (doi:10.1039/c6ra15626f), 2016-01-01
Supplement: c6ra15626f1.pdf [file c6ra15626f1.pdf]

**Electronic Supplementary Materials**

**A novel bioemulsifier from *Geobacillus stearothermophilus* A-2  
and potential application in microbial enhanced oil recovery**

Jie-fang Zhou<sup>†</sup>, Guo-qiang Li<sup>†</sup>, Jun-jie Xie, Xiao-yu Cui, Xiao-hui Dai, Hui-mei Tian,

Pei-ke Gao, Meng-meng Wu, Ting Ma\*

Electronic Supplementary Material 1

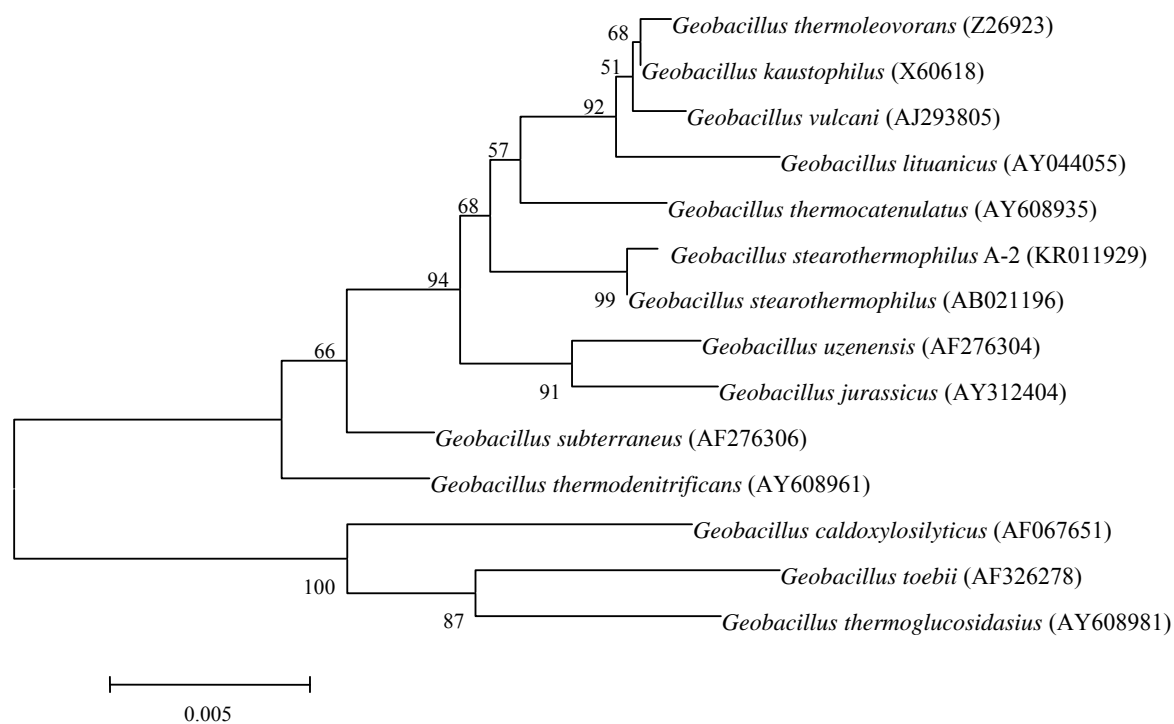

Fig. S1. The phylogenetic tree of strain A-2 constructed by neighbor-joining method with 16S rDNA gene

## Electronic Supplementary Material 2

### Methods:

The strain A-2 was incubated on a semi-solid Luria-Bertani medium (the concentration of agar was 0.6%) with puncture of inoculation method and cultivated for 24 hours at 60 °C. The phenomenon of strain growth along the puncture line was observed.

### Results:

*G. stearothermophilus* A-2 could grow along the puncture line of semi-solid Luria-Bertani medium. Moreover, there were signs of growth at the bottom of puncture line which was an anaerobic zone. Thus the strain A-2 was facultative anaerobic.

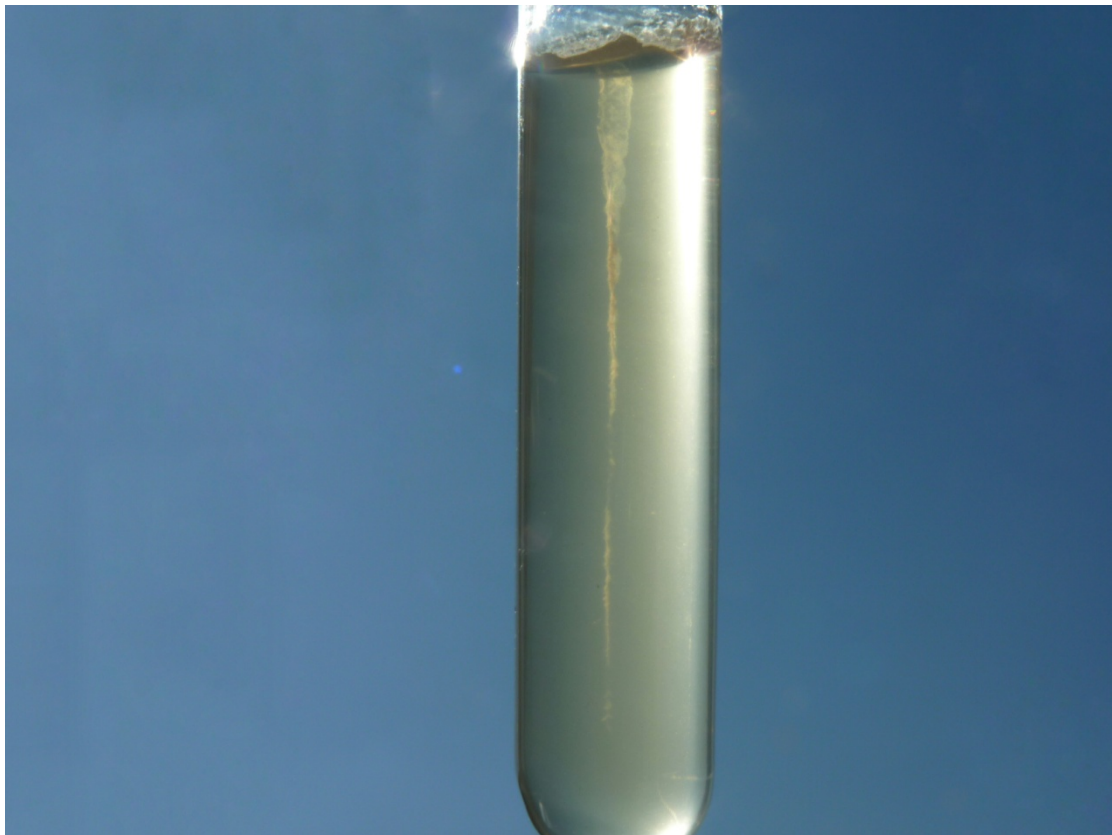

Fig. S2. The stab cultivation of strain A-2 in semi-solid Luria-Bertani medium

## Electronic Supplementary Material 3

Table S1. Different characteristics between the strain A-2 and related species of genus

*Geobacillus*

| Characteristics                                             | 1       | 2       | 3       | 4       | 5       | 6       | 7       | 8       | 9       | 10    |
|-------------------------------------------------------------|---------|---------|---------|---------|---------|---------|---------|---------|---------|-------|
| Temperature rang(°C)                                        | 40-75   | 37-65   | 35-78   | 45-70   | 37-68   | 45-65   | 45-70   | 45-70   | 45-70   | 55-70 |
| pH range                                                    | 4.0-9.0 | 6.0-8.0 | 6.0-8.0 | 6.5-8.5 | 6.0-8.0 | 6.2-7.8 | 6.0-7.6 | 5.5-9.0 | 6.0-8.0 | 6.5   |
| NaCl range (%)                                              | 0-2     | 0-≤5    | 0-4     | ND      | 0-≤5    | 0-4     | 0-≤5    | 0-3     | 0-3     | 0-0.5 |
| Motility                                                    | +       | +       | +       | -       | ND      | +       | +       | +       | ND      | +     |
| Catalase                                                    | +       | V       | +       | +       | ND      | +       | ND      | -       | ND      | +     |
| Oxidase                                                     | -       | V       | +       | +       | ND      | +       | ND      | -       | ND      | +     |
| Hydrolysis of:                                              |         |         |         |         |         |         |         |         |         |       |
| Casein                                                      | -       | V       | W       | +       | +       | -       | -       | -       | V       | +     |
| Aesculin                                                    | +       | V       | +       | ND      | -       | +       | +       | +       | ND      | ND    |
| Gelatin                                                     | -       | +       | -       | -       | +       | +       | -       | +       | ND      | +     |
| Starch                                                      | +       | +       | -+      | +       | +       | +       | +       | +       | V       | +     |
| Gas from glucose                                            | +       | -       | -       | ND      | -       | -       | -       | -       | V       | -     |
| NO <sub>3</sub> <sup>-</sup> → NO <sub>2</sub> <sup>-</sup> | +       | V       | +       | ND      | +       | +       | +       | -       | +       | +     |
| Gas from nitrate                                            | +       | v       | +       | -       | -       | -       | +       | -       | +       | -     |
| Production of acid from:                                    |         |         |         |         |         |         |         |         |         |       |
| L-Arabinose                                                 | +       | -       | -       | -       | -       | +       | -       | -       | +       | +     |
| Cellobiose                                                  | +       | -       | -       | +       | +       | +       | +       | +       | +       | +     |
| Galactose                                                   | -       | -       | -       | +       | V       | +       | +       | +       | +       | +     |
| Mannitol                                                    | +       | V       | +       | +       | +       | +       | ND      | -       | ND      | +     |

|                          |       |       |      |       |       |           |           |     |           |      |
|--------------------------|-------|-------|------|-------|-------|-----------|-----------|-----|-----------|------|
| Xylose                   | -     | -     | -    | V     | +     | -         | -         | +   | +         | +    |
| Glycerol                 | +     | +     | +    | V     | -     | +         | +         | +   | +         | ND   |
| Inositol                 | -     | -     | -    | -     | +     | -         | -         | -   | ND        | ND   |
| Lactose                  | -     | -     | -    | -     | -     | -         | -         | +   | +         | ND   |
| Rhamnose                 | -     | -     | -    | -     | -     | -         | -         | -   | V         | ND   |
| Sorbitol                 | -     | -     | +    | -     | -     | -         | -         | -   | ND        | ND   |
| Simmons                  | -     | V     | +    | +     | +     | -         | -         | +   | V         | ND   |
| Methyl red test          | +     | V     | -    | ND    | +     | -         | +         | -   | ND        | ND   |
| Voges-Proskauer reaction | -     | -     | -    | -     | -     | -         | -         | -   | -         | ND   |
| Urease                   | -     | -     | -    | ND    | -     | -         | -         | -   | -         | ND   |
| DNA G+C content (mol %)  | 52.49 | 46-52 | 55.2 | 52-58 | 51-55 | 50.4-51.5 | 49.7-52.3 | 53. | 48.2-52.3 | 52.5 |

Taxa: 1, Strain A-2; 2, *G.stearothermophilus*; 3, *G. thermocatenulatus*; 4, *G. thermoleovorans*; 5, *G.kaustophilus*; 6, *G. uzenensis*; 7, *G. subterraneus*; 8, *G. vulcani*; 9, *G. thermodenitrifican*; 10, *G.lituanicus*

+, All strains are positive; V, characteristic is variable; -, all strains are negative; ND, not determined.

Electronic Supplementary Material 4

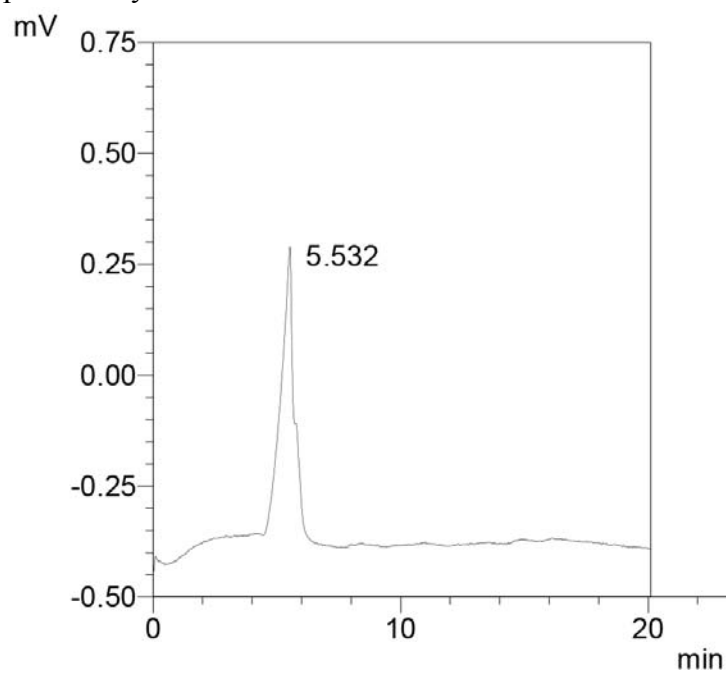

Fig. S3. The Gel-permeation chromatography (GPC) analysis of bioemulsifier produced by *G. stearotherophilus* A-2

Electronic Supplementary Material 5

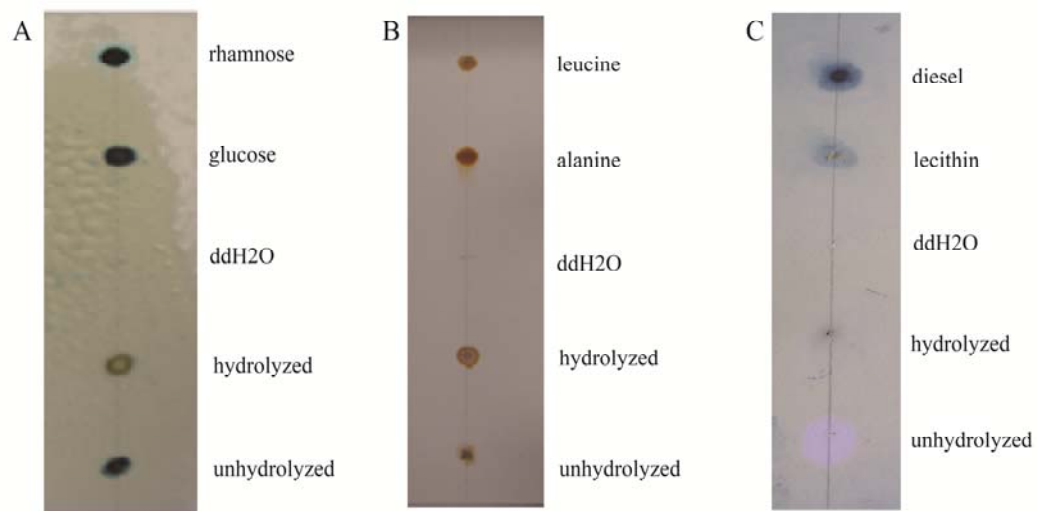

Fig. S4. Qualitative analysis of bioemulsifier produced by *G. stearothermophilus* A-2

(A) Sulfuric acid-anthrone coloration; (B) Ninhydrin coloration; (C) Ammonium molybdate-perchloric acid coloration.

Electronic Supplementary Material 6

**Table S2.** Amino acid components of bioemulsifier produced by *G.stearothermophilus*

A-2

| Amino acid    |     | Content (g /100 g) |
|---------------|-----|--------------------|
| Aspartate     | Asp | 2.69               |
| Methionine    | Met | 1.8                |
| Threonine     | Thr | 1.48               |
| Isoleucine    | Ile | 1.22               |
| Serine        | Ser | 0.98               |
| Leucine       | Leu | 1.83               |
| Glutamate     | Glu | 4.8                |
| Tyrosine      | Tyr | 0.75               |
| Glycine       | Gly | 1.52               |
| Phenylalanine | Phe | 1.12               |
| Alanine       | Ala | 2.73               |
| Lysine        | Lys | 1.64               |
| Cysteine      | Cys | 0.32               |
| Histidine     | His | 0.83               |
| Valine        | Val | 1.98               |
| Arginine      | Arg | 1.32               |
| Proline       | Pro | 0.75               |
| Total content |     | 27.75              |



Electronic Supplementary Material 7

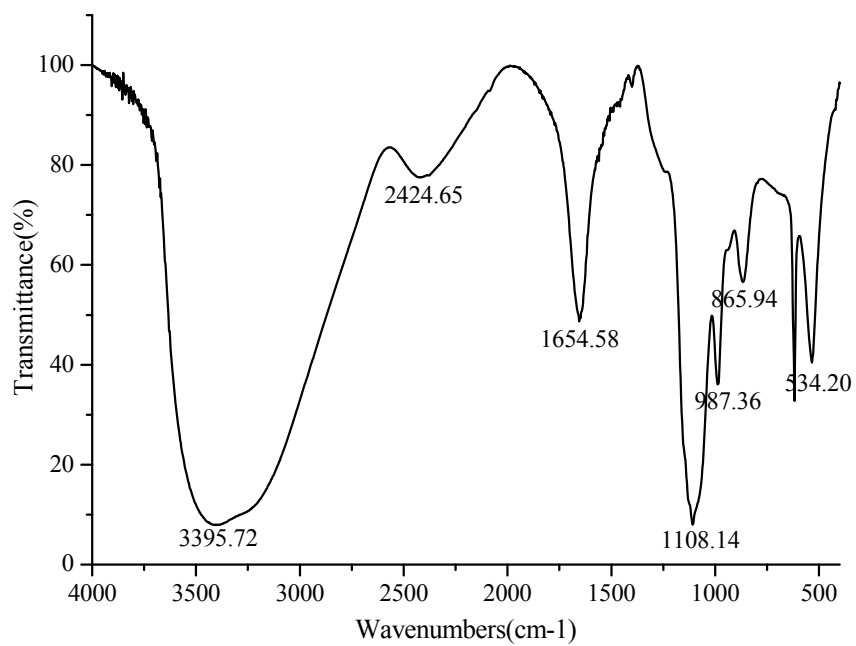

Fig. S5. FT-IR spectra of bioemulsifier produced by the *G. stearotherophilus* A-2

Electronic Supplementary Material 8

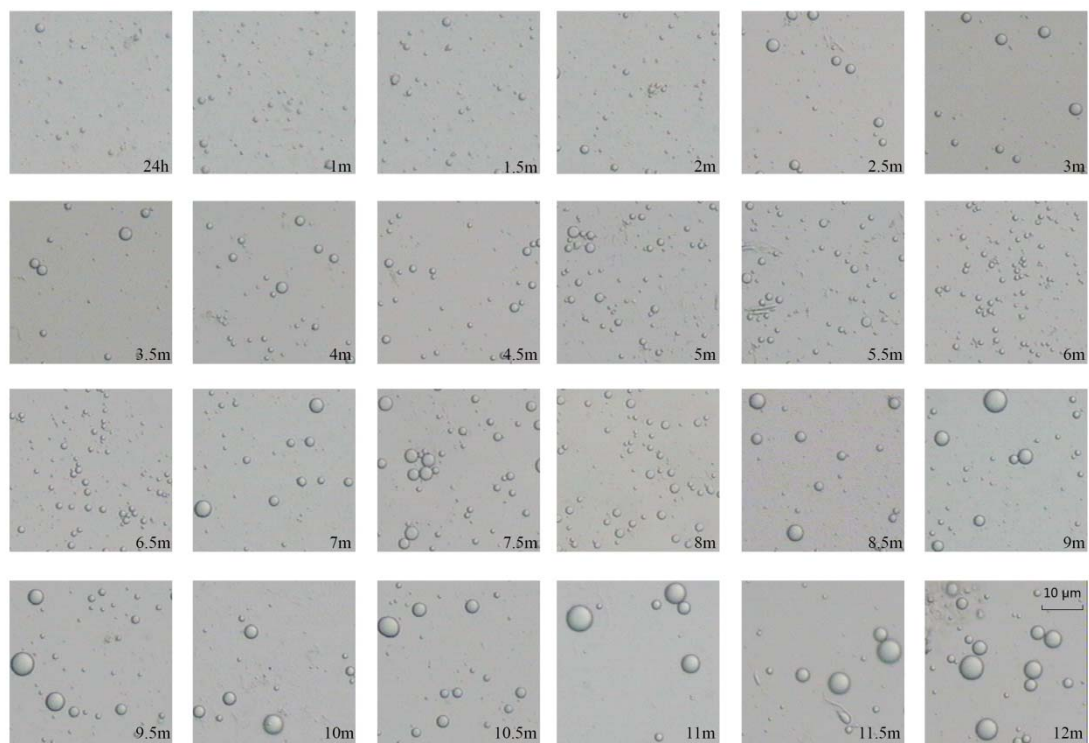

Fig. S6. Effects of placing time on the emulsifying activity of bioemulsifier (24 h-12 month) ( $10 \times$  magnification,  $\mu\text{m}$ )
